# Supplementary material for: Low-temperature H2S gas sensor based on spherical Ag3PO4-doped SnO2
Source: Royal Society of Chemistry journal article supplement (doi:10.1039/d0nj03189e), 2020-01-01
Supplement: d0nj03189e1.pdf [file d0nj03189e1.pdf]

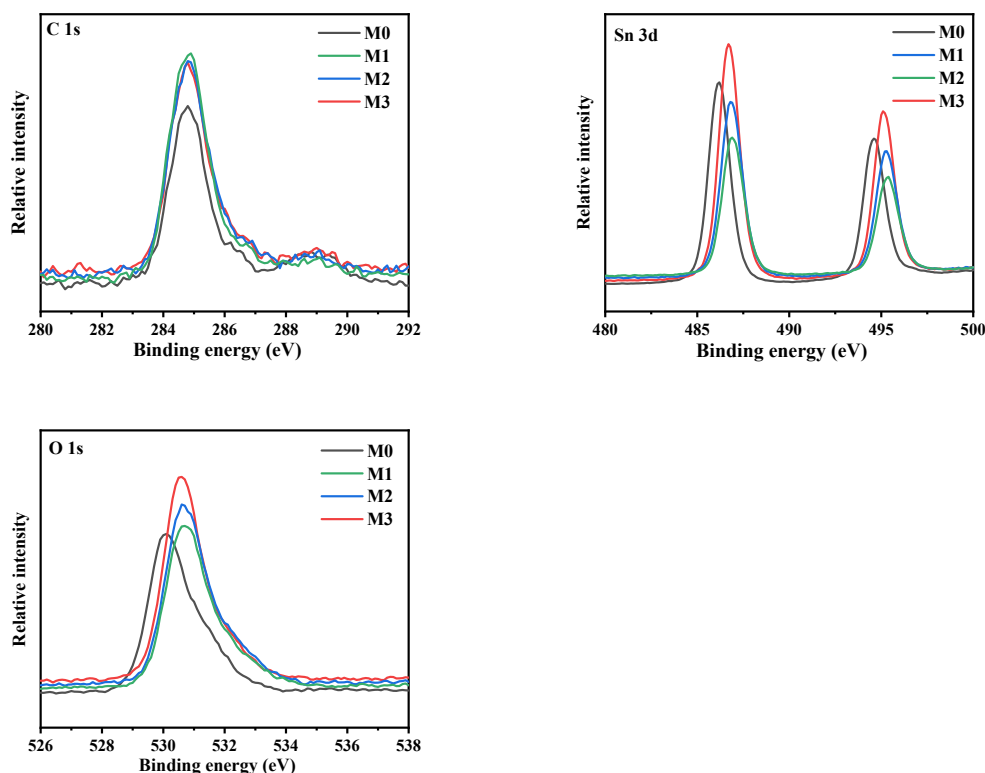

Fig.1 high-resolution XPS spectra of C 1s, Sn 3d, O 1s

Table1 Percentage of oxygen deficiency concentration

| Materials | O I    | O II   | OIII   |
|-----------|--------|--------|--------|
| M0        | 26.95% | 33.34% | 39.71% |
| M1        | 31.13% | 35.54% | 33.33% |
| M2        | 28.46% | 36.37% | 35.17% |
| M3        | 26.85% | 43.02% | 30.13% |

By observing Fig. 1, it can be seen that the peak of Sn 3d of M1-M3 material is shifted relative to the peak of Sn 3d of M0 material, and the same phenomenon occurs in the peak of O 1s, proving that  $\text{Ag}_3\text{PO}_4$  is doped into  $\text{SnO}_2$ , and by observing Table 1, it can be seen that the area ratio of O II is gradually increasing, Oxygen vacancies increase significantly due to the increase in doping. The introduction of oxygen vacancies in gas-sensitive materials facilitates the adsorption of the target gas on the surface of the material, improves the electrical conductivity of the material.

Table2 Composition list

| Materials | Composition                                         |
|-----------|-----------------------------------------------------|
| M0        | $\text{SnO}_2$                                      |
| M1        | 1% $\text{Ag}_3\text{PO}_4$ -doped $\text{SnO}_2$   |
| M2        | 2.5% $\text{Ag}_3\text{PO}_4$ -doped $\text{SnO}_2$ |
| M3        | 5% $\text{Ag}_3\text{PO}_4$ -doped $\text{SnO}_2$   |
